# Supplementary material for: A positive feedback loop between Myc and aerobic glycolysis sustains tumor growth in a Drosophila tumor model
Source: eLife. 2019 Jul 1;8:e46315. doi: 10.7554/eLife.46315 (PMC6636907; doi:10.7554/eLife.46315)
Supplement: Figure 1—source data 1. [file elife-46315-fig1-data1.xlsx]

## Sheet: Sheet1
	Figure 1 - source data
	Figure 1i
	Mean 2-NBDG intensity in RFP negative (wild-type) and RFP positive (hipk-expressing) cells in dpp>RFP + hipk discs
	Mean 2-NBDG
	RFP -ve		RFP +ve
	66.293		69.512
	66.145		71.918
	64.991		68.567
	66.36		69.996
	66.96		69.548
	66.141		70.464
	66.616		69.72
	65.631		68.897
	65.489		68.739
	67.929		69.657
	66.924		68.468
	67.229		72.687
			Significance
			8.92819e-08
	Figure 1k
	FRET/CFP in control (dpp>Glucose Sensor) and hipk-expressing (dpp>Glucose Sensor + hipk) discs
	FRET/CFP
	Control		hipk-expressing discs
	1.8771		1.4123
	2.34885		1.2357
	2.38335		1.4391
	2.55635		1.37605
	2.0492		1.2651
	2.34345		1.63355
	2.25185		1.17195
	2.5053		1.27545
	1.86915		1.49555
	2.83785		1.61865
	2.4958		1.35905
			Significance
			1.03859e-08
	Figure 1 -figure supplement 2a
	Relative mRNA levels of glut1 in control (act5c>RFP) and glut1 knockdown (act5c>glut1-RNAi) pupae
	Relative mRNA levels of glut1
	Control		glut1 knockdown
	1		0.0787705
	1		0.411479
	1		0.508917
			Significance
			0.00687748
	Figure 1 -figure supplement 2b
	Relative mRNA levels of hex-A and hex-C in control (act5c>RFP), hex-A knockdown (act5c>hex-A-RNAi) and hex-C knockdown (act5c>hex-C-RNAi) pupae
	Relative mRNA levels of hex-A
	Control		hex-A knockdown		hex-C knockdown
	1		0.207618		2.19466
	1		0.204455		1.02334
			Significance		Significance
			3.9675e-06		0.407615
	Relative mRNA levels of hex-C
	Control		hex-A knockdown		hex-C knockdown
	1		2.44107		0.0572497
	1		2.70451		0.0827145
			Significance		Significance
			0.0069412		0.000187376
	Figure 1 -figure supplement 2c
	Relative mRNA levels of pgi in control (act5c>RFP) and pgi knockdown (act5c>pgi-RNAi) pupae
	Relative mRNA levels of pgi
	Control		pgi knockdown
	1		0.367
	1		0.378
			Significance
			7.68153e-05
	Figure 1 -figure supplement 2d
	Relative mRNA levels of pfk and pfk2 in control (act5c>RFP), pfk knockdown (act5c>pfk-RNAi) and pfk2 knockdown (act5c>pfk2-RNAi) larvae
	Relative mRNA levels of pfk
	Control		pfk knockdown		pfk2 knockdown
	1		0.347527		1.00677
	1		0.273902		1.17111
			Significance		Significance
			0.00284018		0.392223
	Relative mRNA levels of pfk2
	Control		pfk knockdown		pfk2 knockdown
	1		1.06725		0.505511
	1		0.832558		0.646414
			Significance		Significance
			0.711017		0.0265114
	Figure 1 -figure supplement 2e
	Relative mRNA levels of pgk in control (dpp>RFP) and pgk knockdown (dpp>pgk-RNAi) larval salivary gland cells
	Relative mRNA levels of pgk
	Control		pgk knockdown
	1		0.269
	1		0.369
			Significance
			0.00534751
	Figure 1 -figure supplement 2f
	Relative mRNA levels of pyk in control (act5c>RFP) and pyk knockdown (act5c>pyk-RNAi) larvae
	Relative mRNA levels of pyk
	Control		pyk knockdown
	1		0.116
	1		0.082
			Significance
			0.000355809
	Figure 1 -figure supplement 2g
	Relative mRNA levels of Ldh in control (act5c>RFP) and Ldh knockdown (act5c>Ldh-RNAi) pupae
	Relative mRNA levels of Ldh
	Control		Ldh knockdown
	1		0.109121
	1		0.148132
			Significance
			0.000500713
