# Supplementary material for: A positive feedback loop between Myc and aerobic glycolysis sustains tumor growth in a Drosophila tumor model
Source: eLife. 2019 Jul 1;8:e46315. doi: 10.7554/eLife.46315 (PMC6636907; doi:10.7554/eLife.46315)
Supplement: Figure 2—source data 1. [file elife-46315-fig2-data1.xlsx]

## Sheet: Sheet1
	Figure 2 - source data
	Figure 2a
	mRNA expression of glycolytic genes in hipk-expressing discs (dpp>hipk) relative to control discs (dpp>GFP)
	Relative mRNA levels of hipk					Relative mRNA levels of glut1
	Control		hipk-expressing discs			Control		hipk-expressing discs
	1		19.3974			1		1.26165
	1		13.5509			1		1.82805
	1		17.5673			1		1.73792
			Significance					Significance
			0.000784207					0.0256538
	Relative mRNA levels of hex-A					Relative mRNA levels of hex-C
	Control		hipk-expressing discs			Control		hipk-expressing discs
	1		2.35579			1		4.85149
	1		2.12194			1		3.99076
	1		2.66165			1		4.08213
			Significance					Significance
			0.00090796					0.00026593
	Relative mRNA levels of pgi					Relative mRNA levels of pfk
	Control		hipk-expressing discs			Control		hipk-expressing discs
	1		2.77087			1		1.48353
	1		2.31616			1		1.2127
	1		2.22879			1		1.50443
			Significance					Significance
			0.00102206					0.0130558
	Relative mRNA levels of pfk2					Relative mRNA levels of ald
	Control		hipk-expressing discs			Control		hipk-expressing discs
	1		2.56045			1		1.28046
	1		2.85672			1		1.11794
	1		2.65969			1		1.1018
			Significance					Significance
			4.13038e-05					0.0431384
	Relative mRNA levels of tpi					Relative mRNA levels of gapdh1
	Control		hipk-expressing discs			Control		hipk-expressing discs
	1		1.32438			1		1.40281
	1		1.4799			1		1.33565
	1		1.26326			1		1.28249
			Significance					Significance
			0.00526568					0.000613385
	Relative mRNA levels of gapdh2					Relative mRNA levels of pgk
	Control		hipk-expressing discs			Control		hipk-expressing discs
	1		0.765917			1		1.22059
	1		0.847215			1		1.10751
	1		0.852477			1		1.11164
						1		1.14569
			Significance
			0.00313683					Significance
								0.00139339
	Relative mRNA levels of pglym78					Relative mRNA levels of eno
	Control		hipk-expressing discs			Control		hipk-expressing discs
	1		0.951795			1		1.26091
	1		1.09447			1		0.975783
	1		0.788248			1		1.05021
	1		0.759965			1		0.995839
			Significance					Significance
			0.240195					0.320811
	Relative mRNA levels of pyk					Relative mRNA levels of Ldh
	Control		hipk-expressing discs			Control		hipk-expressing discs
	1		1.41138			1		3.0696
	1		1.23702			1		3.29536
	1		1.41462			1		4.0951
						1		2.9969
			Significance
			0.0037895					Significance
								0.000511683
