# Supplementary material for: A positive feedback loop between Myc and aerobic glycolysis sustains tumor growth in a Drosophila tumor model
Source: eLife. 2019 Jul 1;8:e46315. doi: 10.7554/eLife.46315 (PMC6636907; doi:10.7554/eLife.46315)
Supplement: Figure 3—source data 1. [file elife-46315-fig3-data1.xlsx]

## Sheet: Sheet1
	Figure 3 - source data
	Figure 3a
	mRNA expression of dMyc and sima in hipk-expressing discs (dpp>hipk) relative to control discs (dpp>GFP)
	Relative mRNA levels of dMyc					Relative mRNA levels of sima
	Control		hipk-expressing discs			Control		hipk-expressing discs
	1		1.59485			1		1.06893
	1		1.43473			1		0.926411
	1		1.76842			1		1.18565
			Significance					Significance
			0.00340098					0.466032
