# Supplementary material for: A positive feedback loop between Myc and aerobic glycolysis sustains tumor growth in a Drosophila tumor model
Source: eLife. 2019 Jul 1;8:e46315. doi: 10.7554/eLife.46315 (PMC6636907; doi:10.7554/eLife.46315)
Supplement: Figure 5—source data 1. [file elife-46315-fig5-data1.xlsx]

## Sheet: Sheet1
	Figure 5 - source data
	Figure 5d
	Mean 2-NBDG intensity in dMyc-expressing cells and the neighboring wild-type cells in dMyc-expressing wing discs (dpp>dMyc) (left)
	Mean 2-NBDG
	without dMyc-OE		with dMyc-OE
	65.07		74.468
	64.946		72.856
	66.287		73.519
	62.697		73.191
	60.723		68.571
	66.582		76.323
			Significance
			9.12411e-05
	Mean 2-NBDG intensity in hipk-expressing cells (RFP positive) and the neighboring wild-type cells (RFP negative) in hipk-expressing discs (dpp>RFP + hipk) (middle)
	Mean 2-NBDG
	RFP negative		RFP positive
	64.909		69.605
	66.251		74.713
	66.184		72.934
	67.004		74.646
	66.911		70.268
	66.305		72.835
			Significance
			5.3292e-05
	Mean 2-NBDG intensity in hipk, dMyc-RNAi co-expressing cells (RFP positive) and the neighboring wild-type cells (RFP negative) in hipk-expressing discs with dMyc knockdown (dpp>RFP + hipk + dMyc-RNAi) (right)
	Mean 2-NBDG
	RFP negative		RFP positive
	69.638		70.016
	69.243		69.493
	69.391		69.226
	69.071		69.214
	69.221		69.421
	67.551		67.554
			Significance
			0.774047
	Figure 5e
	mRNA expression of glycolytic genes in discs of the indicated genotypes
	Relative mRNA levels of glut1
	dpp>GFP		dpp>hipk		dpp>hipk + dMyc-RNAi		dpp>dMyc
	1		6.63439		1.11634		2.33521
	1		1.55552		1.65101		2.90748
	1		2.09341		0.938284		2.11938
					Significance
					0.248561
	Relative mRNA levels of hex-A
	dpp>GFP		dpp>hipk		dpp>hipk + dMyc-RNAi		dpp>dMyc
	1		1.70311		0.827107		3.03841
	1		1.89451		0.793814		1.93545
	1		2.22872		1.30247		1.83865
					Significance
					0.0126191
	Relative mRNA levels of hex-C
	dpp>GFP		dpp>hipk		dpp>hipk + dMyc-RNAi		dpp>dMyc
	1		3.40154		2.2743		3.84975
	1		4.14739		2.34906		4.80845
	1		4.57929		2.31967		2.63877
					Significance
					0.00741389
	Relative mRNA levels of pgi
	dpp>GFP		dpp>hipk		dpp>hipk + dMyc-RNAi		dpp>dMyc
	1		1.9857		0.74121		2.86252
	1		2.24471		1.10146		2.79374
	1		2.77983		1.67579		1.41913
					Significance
					0.0315528
	Relative mRNA levels of pfk2
	dpp>GFP		dpp>hipk		dpp>hipk + dMyc-RNAi		dpp>dMyc
	1		2.61332		1.34849		2.33335
	1		2.74769		1.56777		2.93173
	1		3.02985		1.56778		2.08412
					Significance
					0.0008033
	Relative mRNA levels of Ldh
	dpp>GFP		dpp>hipk		dpp>hipk + dMyc-RNAi		dpp>dMyc
	1		2.84647		1.81065		3.3114
	1		3.23547		1.79703		3.86625
	1		3.62534		1.93022		2.39596
					Significance
					0.00371045
