# Supplementary material for: A positive feedback loop between Myc and aerobic glycolysis sustains tumor growth in a Drosophila tumor model
Source: eLife. 2019 Jul 1;8:e46315. doi: 10.7554/eLife.46315 (PMC6636907; doi:10.7554/eLife.46315)
Supplement: Figure 6—source data 1. [file elife-46315-fig6-data1.xlsx]

## Sheet: Sheet1
	Figure 6 - source data
	Figure 6 - figure supplement 1
	Relative pyruvate levels in control (act5c>RFP), pfk2 knockdown (act5c>pfk2-RNAi) and pfk knockdown (act5c>pfk-RNAi) larvae
	Biological sample set 1
	Protein levels in samples			pfk RNAi		2.46168
				pfk2 RNAi		2.4972
				control		2.5514
								average
	Pyruvate levels in samples			pfk RNAi		0.0839	0.0777	0.0808
				pfk2 RNAi		0.0841	0.0737	0.0789
				control		0.158	0.1443	0.15115
	Normalized pyruvate levels			pfk RNAi		0.0328231
				pfk2 RNAi		0.0315954
				control		0.0592419
	Relative pyruvate levels			pfk RNAi		0.554051
				pfk2 RNAi		0.533329
				control		1
	Biological sample set 2
	Protein levels in samples			pfk RNAi		2.45421
				pfk2 RNAi		2.45794
				control		2.51028
								average
	Pyruvate levels in samples			pfk RNAi		0.1493	0.1336	0.14145
				pfk2 RNAi		0.0859	0.0933	0.0896
				control		0.3568	0.3695	0.36315
	Normalized pyruvate levels			pfk RNAi		0.0576358
				pfk2 RNAi		0.0364532
				control		0.144665
	Relative pyruvate levels			pfk RNAi		0.398408
				pfk2 RNAi		0.251984
				control		1
	Relative pyruvate levels
						average		significance
	pfk RNAi		0.554051	0.398408		0.47623		0.0213708
	pfk2 RNAi		0.533329	0.251984		0.392656		0.0496834
	control		1	1		1
